# Supplementary material
Source: PubMed Central journal article supplement (PMC4710451)
Supplement: SD1.pdf [file SD1.pdf]

SUPPLEMENTAL TABLE 1

Survey-weighted multiple logistic regression results for *Helicobacter pylori* seropositivity among participants in phase 1 of the third NHANES included in analysis ( $N = 8,731$ ), United States, 1989–1991

|                               | Model 1 |            |         | Model 2 |            |         | Model 3 |            |         | Model 4 |            |         | Model 5 |            |         |
|-------------------------------|---------|------------|---------|---------|------------|---------|---------|------------|---------|---------|------------|---------|---------|------------|---------|
|                               | OR      | 95% CI     | P       |
| <b>Hepatitis A serostatus</b> |         |            |         |         |            |         |         |            |         |         |            |         |         |            |         |
| Negative                      |         |            |         |         |            |         |         |            |         |         |            |         |         |            |         |
| Positive                      | 2.87    | 2.40, 3.45 | < 0.001 | 2.67    | 2.23, 3.20 | < 0.001 | 2.47    | 2.06, 2.98 | < 0.001 | 2.46    | 2.05, 2.96 | < 0.001 | 2.45    | 2.03, 2.97 | < 0.001 |
| <b>Age category</b>           |         |            |         |         |            |         |         |            |         |         |            |         |         |            |         |
| ≤ 19                          |         |            |         |         |            |         |         |            |         |         |            |         |         |            |         |
| 20–49                         | 0.95    | 0.74, 1.23 | 0.700   | 0.91    | 0.71, 1.17 | 0.457   | 1.01    | 0.78, 1.31 | 0.940   | 1.02    | 0.79, 1.32 | 0.858   | 0.72    | 0.43, 1.19 | 0.185   |
| 50–69                         | 2.23    | 1.75, 2.86 | < 0.001 | 2.20    | 1.72, 2.81 | < 0.001 | 2.62    | 2.01, 3.42 | < 0.001 | 2.72    | 2.06, 3.57 | < 0.001 | 1.94    | 1.24, 3.03 | 0.006   |
| 70+                           | 3.41    | 2.57, 4.51 | < 0.001 | 3.41    | 2.57, 4.54 | < 0.001 | 3.73    | 2.82, 4.91 | < 0.001 | 3.90    | 2.89, 5.26 | < 0.001 | 2.83    | 1.84, 4.37 | < 0.001 |
| <b>Gender</b>                 |         |            |         |         |            |         |         |            |         |         |            |         |         |            |         |
| Male                          |         |            |         |         |            |         |         |            |         |         |            |         |         |            |         |
| Female                        | 0.83    | 0.71, 0.96 | 0.015   | 0.82    | 0.71, 0.96 | 0.015   | 0.80    | 0.69, 0.93 | 0.006   | 0.81    | 0.69, 0.94 | 0.007   | 0.81    | 0.68, 0.95 | 0.014   |
| <b>Race</b>                   |         |            |         |         |            |         |         |            |         |         |            |         |         |            |         |
| White                         |         |            |         |         |            |         |         |            |         |         |            |         |         |            |         |
| Black                         | 3.46    | 2.91, 4.12 | < 0.001 | 3.47    | 2.91, 4.14 | < 0.001 | 3.03    | 2.54, 3.62 | < 0.001 | 3.02    | 2.54, 3.58 | < 0.001 | 3.02    | 2.52, 3.63 | < 0.001 |
| Mexican                       | 3.14    | 2.54, 3.87 | < 0.001 | 2.60    | 2.03, 3.32 | < 0.001 | 2.23    | 1.74, 2.87 | < 0.001 | 2.16    | 1.72, 2.71 | < 0.001 | 2.19    | 1.75, 2.75 | < 0.001 |
| Other                         | 3.22    | 2.28, 4.53 | < 0.001 | 2.18    | 1.48, 3.21 | < 0.001 | 1.93    | 1.29, 2.89 | 0.003   | 1.91    | 1.28, 2.83 | 0.003   | 1.92    | 1.29, 2.86 | 0.003   |
| <b>Birthplace</b>             |         |            |         |         |            |         |         |            |         |         |            |         |         |            |         |
| U.S. born                     |         |            |         |         |            |         |         |            |         |         |            |         |         |            |         |
| Foreign born                  | –       | –          | –       | 1.81    | 1.29, 2.54 | 0.001   | 1.85    | 1.34, 2.56 | 0.001   | 1.82    | 1.29, 2.55 | 0.001   | 1.83    | 1.30, 2.59 | 0.001   |
| <b>Income/poverty ratio</b>   |         |            |         |         |            |         |         |            |         |         |            |         |         |            |         |
| ≥ 5                           |         |            |         |         |            |         |         |            |         |         |            |         |         |            |         |
| 3–4.9                         | –       | –          | –       | –       | –          | –       | 1.20    | 0.92, 1.56 | 0.166   | 1.19    | 0.92, 1.53 | 0.185   | 1.19    | 0.92, 1.54 | 0.177   |
| 2–2.9                         | –       | –          | –       | –       | –          | –       | 1.77    | 1.36, 2.31 | < 0.001 | 1.74    | 1.33, 2.26 | < 0.001 | 1.73    | 1.33, 2.27 | < 0.001 |
| 1–1.9                         | –       | –          | –       | –       | –          | –       | 1.71    | 1.26, 2.34 | 0.002   | 1.66    | 1.21, 2.28 | 0.003   | 1.64    | 1.19, 2.26 | 0.004   |
| < 1                           | –       | –          | –       | –       | –          | –       | 2.19    | 1.56, 3.07 | < 0.001 | 2.07    | 1.47, 2.93 | < 0.001 | 2.05    | 1.43, 2.93 | < 0.001 |
| <b>Household crowding*</b>    |         |            |         |         |            |         |         |            |         |         |            |         |         |            |         |
| Smoking                       |         |            |         |         |            |         |         |            |         |         |            |         |         |            |         |
| Never                         | –       | –          | –       | –       | –          | –       | –       | –          | –       | 1.13    | 0.90, 1.41 | 0.270   | 1.15    | 0.92, 1.45 | 0.200   |
| Current                       | –       | –          | –       | –       | –          | –       | –       | –          | –       | –       | –          | –       | –       | –          | –       |
| Former                        | –       | –          | –       | –       | –          | –       | –       | –          | –       | –       | –          | –       | –       | –          | –       |
| Missing                       | –       | –          | –       | –       | –          | –       | –       | –          | –       | –       | –          | –       | –       | –          | –       |
| <b>Alcohol</b>                |         |            |         |         |            |         |         |            |         |         |            |         |         |            |         |
| No                            | –       | –          | –       | –       | –          | –       | –       | –          | –       | –       | –          | –       | –       | –          | –       |
| Yes                           | –       | –          | –       | –       | –          | –       | –       | –          | –       | –       | –          | –       | –       | –          | –       |
| Missing                       | –       | –          | –       | –       | –          | –       | –       | –          | –       | –       | –          | –       | –       | –          | –       |

CI = confidence interval; NHANES = National Health and Nutrition Examination Survey; OR = odds ratio.  
 Model 1: hepatitis A + age + gender + race, Hosmer–Lemeshow goodness-of-fit ( $P = 0.36$ ); Model 2: Model 1 + birthplace, Hosmer–Lemeshow goodness-of-fit ( $P = 0.21$ ); Model 3: Model 2 + income-to-poverty ratio, Hosmer–Lemeshow goodness-of-fit ( $P = 0.001$ ); Model 4: Model 3 + household crowding, Hosmer–Lemeshow goodness-of-fit ( $P = 0.04$ ); Model 5: Model 4 + smoking + alcohol, Hosmer–Lemeshow goodness-of-fit ( $P = 0.01$ ).  
 \* Household crowding modeled as a continuous variable (persons per room in household).

SUPPLEMENTAL TABLE 2

Survey-weighted multiple logistic regression sensitivity analysis results restricted to participants without hepatitis A immunizations in the 1999 NHANES, United States, 1999–2000 ( $N = 5,452$ )

|                        | OR   | 95% CI      | <i>P</i> |
|------------------------|------|-------------|----------|
| Hepatitis A serostatus |      |             |          |
| Negative               | –    | –           | –        |
| Positive               | 2.32 | 1.73, 3.12  | < 0.001  |
| Age category           |      |             |          |
| ≤ 19 and under         | –    | –           | –        |
| 20–49                  | 3.63 | 2.50, 5.26  | < 0.001  |
| 50–69                  | 7.51 | 5.30, 10.65 | < 0.001  |
| 70+                    | 9.16 | 5.45, 15.39 | < 0.001  |
| Gender                 |      |             |          |
| Male                   | –    | –           | –        |
| Female                 | 0.88 | 0.77, 1.00  | 0.055    |
| Race                   |      |             |          |
| White                  | –    | –           | –        |
| Black                  | 3.83 | 2.62, 5.59  | < 0.001  |
| Mexican                | 3.00 | 2.16, 4.16  | < 0.001  |
| Other                  | 1.92 | 1.34, 2.75  | 0.002    |
| Birthplace             |      |             |          |
| U.S. born              | –    | –           | –        |
| Foreign born           | 1.88 | 1.29, 2.75  | 0.003    |
| Income/poverty ratio   |      |             |          |
| ≥ 5                    | –    | –           | –        |
| 3–4.9                  | 1.18 | 0.76, 1.84  | 0.434    |
| 2–2.9                  | 1.27 | 0.86, 1.88  | 0.202    |
| 1–1.9                  | 1.51 | 1.09, 2.11  | 0.017    |
| < 1                    | 2.68 | 1.76, 4.09  | < 0.001  |
| Household crowding     | 1.24 | 0.83, 1.86  | 0.262    |

CI = confidence interval; NHANES = National Health and Nutrition Examination Survey; OR = odds ratio.

SUPPLEMENTAL TABLE 3

Association of *Helicobacter pylori* with infectious diseases over various transmission modes, NHANES 1999

| <i>N</i> | Infection                | Transmission       | OR   | <i>P</i>       | 95% CI    |
|----------|--------------------------|--------------------|------|----------------|-----------|
| 4,241    | HSV-1                    | Sex/direct         | 2.81 | < <b>0.001</b> | 1.98 3.98 |
| 3,213    | HSV-2                    | Sex/direct         | 1.48 | 0.092          | 0.93 2.34 |
| 924      | Varicella Zoster         | Sex/direct         | 2.04 | 0.052          | 0.99 4.19 |
| 2,168    | HIV                      | Sex/direct         | 2.06 | 0.361          | 0.4 10.6  |
| 2,588    | <i>Chlamydia</i>         | Sex/direct         | 1.12 | 0.80           | 0.43 2.88 |
| 5,679    | <i>Cryptosporidium</i> 1 | Fecal–oral         | 2.14 | < <b>0.001</b> | 1.77 2.58 |
| 5,679    | <i>Cryptosporidium</i> 2 | Fecal–oral         | 2.2  | < <b>0.001</b> | 1.62 2.97 |
| 8,015    | <i>Toxoplasma</i>        | Foodborne/zoonotic | 1.91 | < <b>0.001</b> | 1.52 2.39 |

CI = confidence interval; HSV = herpes simplex virus; HIV = human immunodeficiency virus; NHANES = National Health and Nutrition Examination Survey; OR = odds ratio. Survey weighted and adjusted for age, race, and gender. Bold values indicate statistically significant *P* values.
